# Supplementary material
Source: Springer Nature journal article supplement (https://www.springermedizin.de/resource/supplementary/12913_2010_1462_MOESM1_ESM.pdf/9528198)

### Hispanic

### Non-Hispanic

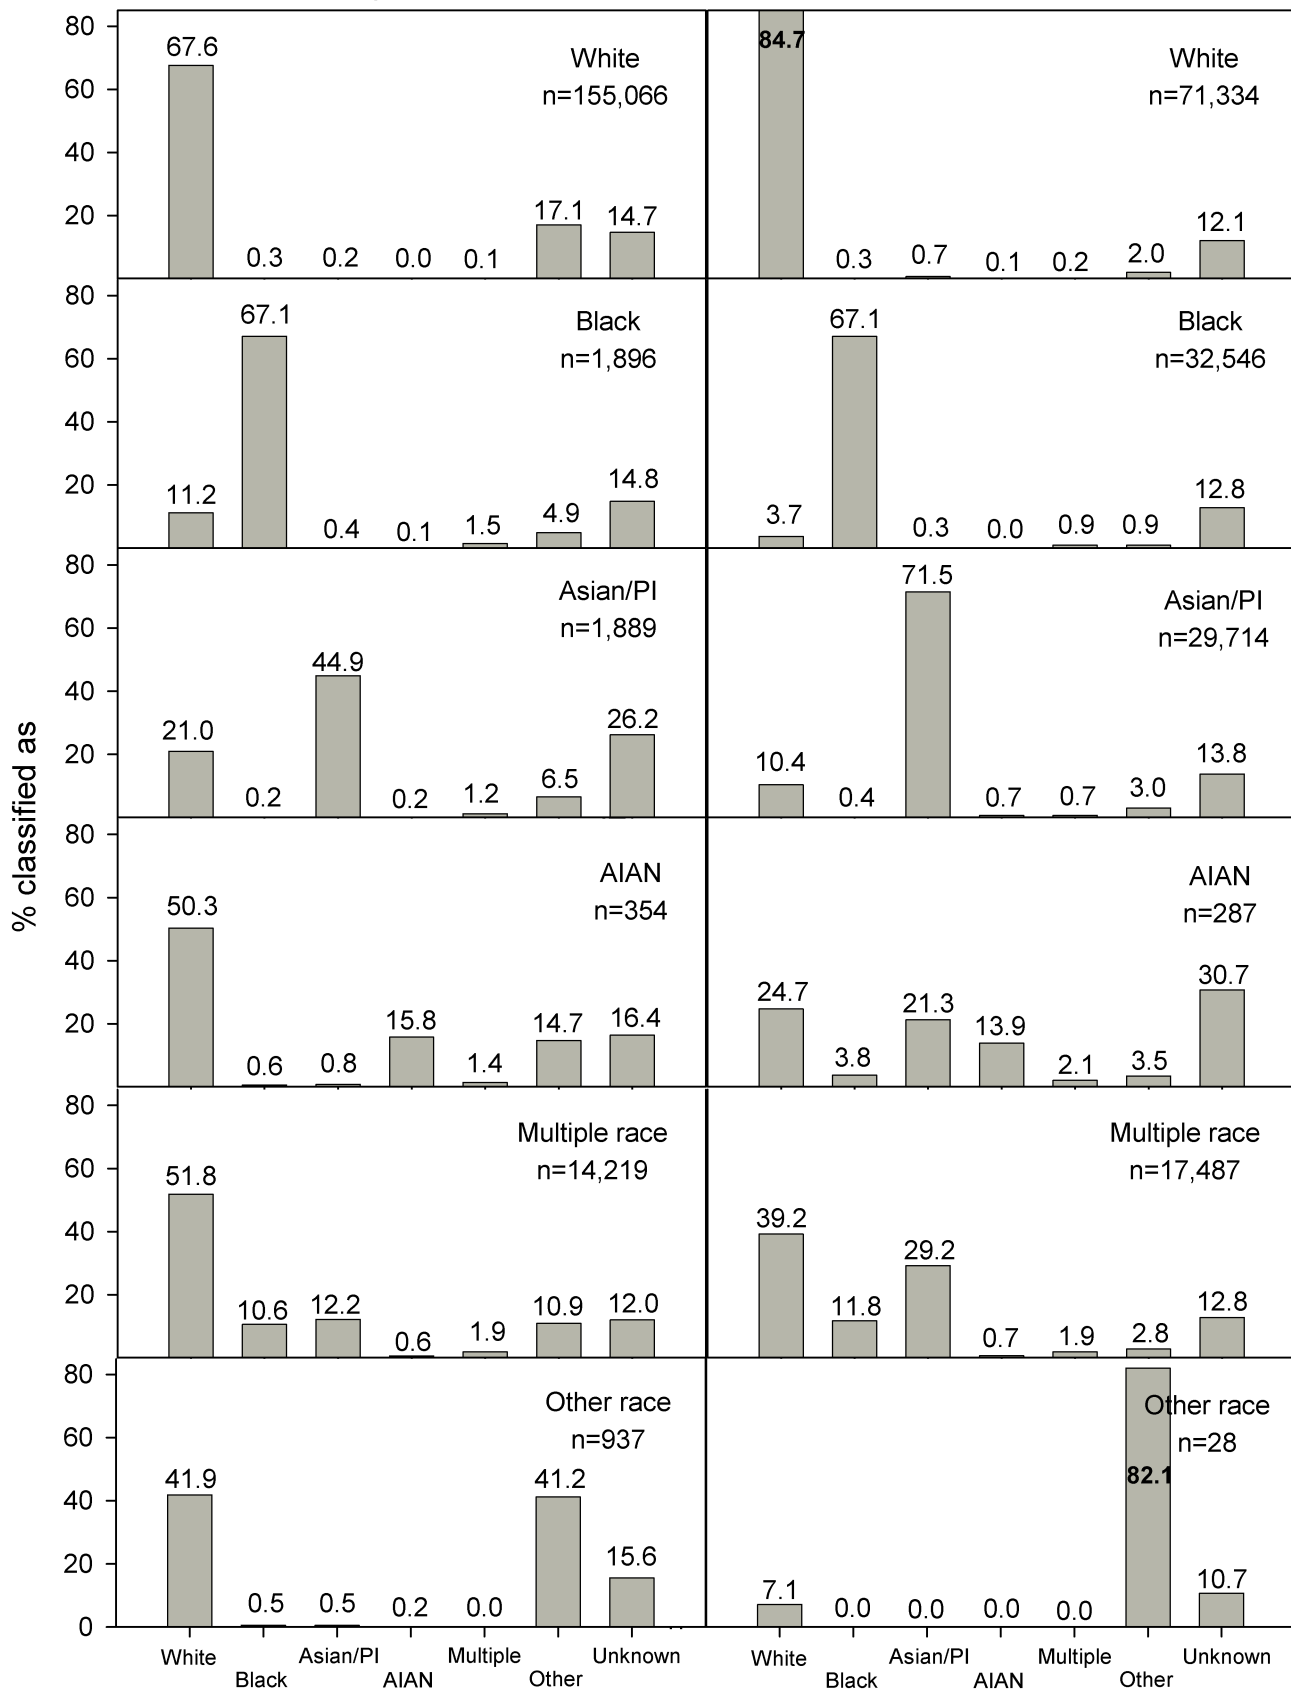

Supplement: MOESM1 [file 9528198]
